# Supplementary material for: Rapid whole genome sequence typing reveals multiple waves of SARS-CoV-2 spread
Source: bioRxiv or medRxiv preprint supplement (doi:10.1101/2020.06.08.139055), 2020-06-08
Supplement: Supplementary file [file media-1.pdf]

## GNUVID: Supplementary Material

|          |                                                     |          |
|----------|-----------------------------------------------------|----------|
| <b>1</b> | <b>INSTALLATION</b> .....                           | <b>2</b> |
| <b>2</b> | <b>GNUVID.PY USAGE</b> .....                        | <b>2</b> |
| 2.1      | DEPENDENCY.....                                     | 2        |
| 2.2      | INPUT.....                                          | 2        |
| 2.3      | COMMAND LINE OPTIONS.....                           | 2        |
| 2.4      | OUTPUT.....                                         | 2        |
| <b>3</b> | <b>METHODS FOR THE PRECOMPRESSED DATABASE</b> ..... | <b>3</b> |
| <b>4</b> | <b>REFERENCES</b> .....                             | <b>3</b> |

## 1 Installation

```
git clone https://github.com/ahmedmagds/GNUVID
cd GNUVID/bin
chmod +x *.py
pwd
export PATH=$PATH:/path/to/folder/having/GNUVID/bin
```

If it is needed permanently, the last line can be added to `.bashrc` or `.bash_profile`.

## 2 GNUVID.py Usage

### 2.1 Dependency

- Python3 [1].
- Blastn [2].

### 2.2 Input

1. database (precompressed (.txt) or a folder of individual genomes(.fna) to be compressed).
2. Reference File (MN908947.3\_cds.fna).
3. Query CDS or whole genome FASTA file (.fna) or folder of query files.
4. Strains\_order.txt: order of the strains by date of collection (**optional with -m but preferred**).
5. country\_region.csv: Assigning regions (Europe, Asia..etc) to different countries (**optional with -m but preferred**).

### 2.3 Command line options

*Create compressed database (ordered by date of collection and geographical regions assigned to the countries)*

```
GNUVID.py -m COVID19_10422_isolates/ -I Isolates_date_order.txt -cc
country_region.csv -o GNUVID_results -p GNUVID MN908947.3_cds.fna CDS
queries_folder/
```

Use precompressed database in Whole Genome Mode (the script will use blastn to identify the 10 ORFs in the WGS)

```
GNUVID.py -d db/GNUVID_05172020_comp_db.txt db/MN908947.3_cds.fna
WG test_WG_query/
```

Use precompressed database in CDS Mode

```
GNUVID.py -d db/GNUVID_05172020_comp_db.txt db/MN908947.3_cds.fna
CDS test_CDS_query/
```

### 2.4 Output

*Always with -m or -d*

```
query_GNUVID_report.txt
Query_isolates_GNUVID_ST_Report.txt
GNUVID_date_time.log
```

*Always with -m*

```
prefix_comp_db.txt and prefix_DB_isolates_report.txt
```

### 3 Methods for the Precompressed Database

All SARS-CoV-2 genomes (n=17,504) that are complete and high coverage were downloaded from GISAID [3] on May 17<sup>th</sup> 2020. We kept 16,866 that were at least 29,000 bp in length and had less than 1% “N”s. The 10 ORFs were identified in the 16,866 genomes using blastn [4]. All isolates submitted before December 2019 were excluded.

```
GNUVID_FASTA_divider.py -l 29000 -N 1.0 COVID19_fasta gisaid_hcov-19_2020_05_17_05.fasta
```

```
for i in `cat /home/amoustafa/nas3/COVID-19/COVID19_11.list`;do blastn -task blastn -out COVID19_blast/${i}_results.txt -query MN908947.3_cds.fna -subject COVID19_fasta/${i}.fna -evalue 0.000001 -outfmt '6 qseqid sseq sstart send pident qcovs'; done
```

```
Extract_fasta_sequence_blast_report.py COVID19_blast_extracted COVID19_blast/
```

```
GNUVID_database_customizer.py -p -i -l COVID19_cgMLST_10422_strains.csv COVID19_10422_strains COVID19_blast_extracted/
```

```
GNUVID.py -m COVID19_10422_strains/ -l COVID19_10422_strains_date_order.txt -o GNUVID_05172020 -p GNUVID_05172020 -cc country_continent.csv test_query/
```

The prefix\_DB\_isolates\_report.txt was then used in PHYLOViZ tool [5] to identify CCs at the double locus variant (DLV) level using the goeBURST MST algorithm [6, 7]. CCs were mapped back to the STs using a custom script.

```
Clonal_complex_assigner.py -r resolve_10422.csv GNUVID_10422_strains_report_CC_assigned.txt phyloviz_eBURST_full_MST_10422.txt prefix_DB_isolates_report.txt
```

### 4 References

1. **Python3:** <https://www.python.org/>. Accessed 05 February 2019.
2. Camacho C, Coulouris G, Avagyan V, Ma N, Papadopoulos J, Bealer K, Madden TL: **BLAST+: architecture and applications.** *BMC Bioinformatics* 2009, **10**:421.
3. Shu Y, McCauley J: **GISAID: Global initiative on sharing all influenza data - from vision to reality.** *Euro Surveill* 2017, **22**.
4. Altschul SF, Gish W, Miller W, Myers EW, Lipman DJ: **Basic local alignment search tool.** *Journal of Molecular Biology* 1990, **215**:403-410.
5. Nascimento M, Sousa A, Ramirez M, Francisco AP, Carrico JA, Vaz C: **PHYLOViZ 2.0: providing scalable data integration and visualization for multiple phylogenetic inference methods.** *Bioinformatics* 2017, **33**:128-129.

6. Francisco AP, Bugalho M, Ramirez M, Carriço JA: **Global optimal eBURST analysis of multilocus typing data using a graphic matroid approach.** *BMC Bioinformatics* 2009, **10**:152.
7. Feil EJ, Li BC, Aanensen DM, Hanage WP, Spratt BG: **eBURST: Inferring Patterns of Evolutionary Descent among Clusters of Related Bacterial Genotypes from Multilocus Sequence Typing Data.** *Journal of Bacteriology* 2004, **186**:1518.
